# Supplementary material
Source: PubMed Central journal article supplement (PMC8145158)
Supplement: jamapediatr-e210766-s001.pdf [file jamapediatr-e210766-s001.pdf]

## Protocol and Analyses

Study Title: Impact of a Communication Intervention for Clinicians on Missed Opportunities for HPV Vaccination: A Randomized Controlled Trial from the American Academy of Pediatrics Pediatric Research in Office Settings (PROS) Network

Clinical Trials Registration: NCT03599557

### Brief Summary:

This trial, part of a multi-year comprehensive intervention, is located in pediatric practices and health systems within the American Academy of Pediatrics Pediatric Research in Office Settings (PROS) Network. Most adolescents who receive human papillomavirus (HPV) vaccine are vaccinated in pediatric practices, yet missed opportunities (MOs) for HPV vaccination occur often and lead to low HPV vaccination rates. This cluster randomized clinical trial (RCT) will test the effectiveness (and cost-effectiveness) of training providers on HPV vaccine communication to reduce MOs and increase HPV vaccination rates.

### Methods and Procedures

For this first part of the intervention, there are 2 study periods. We will randomize by practice (not provider) to avoid contamination. We will assess missed opportunities (MOs) and HPV vaccine rates using monthly and period-aggregate data, excluding the periods of ramping up of each intervention.

Period 0: This is the 12-month baseline period.

Period 1: Arm-1 practices will receive communication skills training. Arm-2 control practices will receive standard of care. The duration of the communication intervention period will be 6 months.

All analyses will be stratified by visit type (well or sick) and dose (initial vs subsequent). We consider MOs by visit type and dose separately as we hypothesized that MOs for different visit types and doses are driven by different factors. For the test of this communication intervention, we hypothesized that since almost all HPV vaccinations (and nearly 100% of initial doses) are provided during well-child care visits, an intervention focused upon communication may be potentially effective especially during well-child care visits.

Future interventions that focus upon changing practice procedures (e.g., providing feedback to providers with suggestions for utilizing sick/chronic visits, or prompts to remind providers to consider HPV vaccinations) may have more of an impact at sick/chronic visits and for subsequent doses.

### Study Design

Study Type: Interventional (Clinical Trial)

Actual Enrollment: 48 participants, where each participant is a pediatric primary care practice, to include all eligible patients at the practices during the two periods.

Allocation: Randomized

Intervention Model: Parallel Assignment

51 Intervention Model Description: This study will use a cluster RCT study design to test the impact  
52 of the communication intervention to reduce missed opportunities (MOs) and raise HPV vaccine  
53 rates.

54

55 Arms and Interventions:

- 56 • Arm 1 will receive the STOP-HPV communication intervention
- 57 • Arm 2 will receive standard of care

58

59

60

## 61 **Inclusion and Exclusion criteria**

62 *Practice Inclusion Criteria:*

- 63 • The practice provides HPV vaccination services to adolescents.
- 64 • The practice is part of Physician's Computer Company (PCC), Office Practicum (OP) or  
65 (a) yet-to-be selected health system(s).
- 66 • The practice has had the same EHR system in place for a year or more (with special  
67 consideration on a case by case basis if they are close to but not do not reach a year).
- 68 • The practice agrees to not participate in other HPV-related QI projects or research  
69 interventions during the study period (with special consideration on a case by case  
70 basis).

71

72 *Practice Exclusion Criteria:*

- 73 • The practice plans to change EHR systems in the next three years.
- 74 • The practice participated in the last year, is currently engaged in, or plans to participate  
75 in an office-based HPV-related quality improvement (QI) project or research intervention  
76 during the study period (with special consideration on a case by case basis).
- 77 • Estimated 20% or more of adolescents at the practice receive HPV vaccinations at  
78 schools or health department clinics (given standard practice and published data, the  
79 investigators expect that few to no practices will need to be excluded based on this  
80 restriction).

81

82 *Patient inclusion criteria:*

- 83 • All patients of participating practices (intervention and comparison) aged 11-17 years  
84 who have at least 1 visit to the practice within the past two years.

85

86 *Patient exclusion criteria:*

- 87 • None apart from age of patients (above).

88

89

## 90 **Main Outcomes and Measures**

91 Primary Outcome Measures:

92 1. Rate and change in the rate of missed vaccination opportunities among all clinicians  
93 [ Time Frame: Monthly from months 0 (baseline) to month 6, and also aggregated over  
94 the 6-month period from month 0, where month 0 is site specific and depends on  
95 completion of site staff training and readiness to proceed. ]

96 Change in the rate of missed vaccination opportunities from baseline through the end  
97 of the communication intervention period among all clinicians.

98 2. Rate and change in the rate of missed vaccination opportunities among consenting  
99 clinicians [ Time Frame: Monthly from months 0 (baseline) to month 6, and also  
100 aggregated over the 6-month period from month 0, where month 0 is site specific and  
101 depends on completion of site staff training and readiness to proceed. ]

102 Change in the rate of missed vaccination opportunities from baseline through the end  
103 of the communication intervention period among consenting clinicians.

## 104 **Analysis**

### 105 *Primary Analysis*

106 All analyses will be stratified by visit type (well or sick) and dose (initial vs subsequent). Visit-  
107 level analyses will implement marginal models (such as estimated with generalized estimating  
108 equations (GEE) (Fitzmaurice 2011) to estimate relative and absolute changes in rates between  
109 intervention and control practices, and over time. These methods facilitate estimation of  
110 standardized (for patient-level characteristics) (Korn and Graubard 1999) rates of MOs over  
111 time. Assumptions include a large number of practice sites (Hayes and Moulton 2017), an  
112 assumption that our study satisfies for comparisons of all 48 sites. With fewer than 40 clusters,  
113 however, some form of correction is warranted to correct confidence bounds. (Huang 2016).

114 GEE methods will use marginal mean models with a logit link (binary family) as is appropriate  
115 for binary outcomes for missed opportunities. The clustering level will be the practice site for all  
116 analyses. This approach will not consider clustering of clinicians within practice site. This  
117 approach will also not consider the repeated measures of visits within child. Children are not  
118 nested within clinician, as a child can be seen by more than one clinician.

119

120 GEE methods will produce robust standard errors and respective confidence bounds directly for  
121 odds ratios. Odds ratios, however, are not easy to interpret for even rates that are common. For  
122 that reason, we will transform log odds estimates and their ratios into risk ratios and risk  
123 differences, and then use the delta method to estimate robust confidence bounds on the risk  
124 difference scale. Secondary analyses will include standardization by visit and patient-level  
125 factors prior to transformation.

126

127 Survey methods provide a computational alternative to GEE methods, which can fail with large  
128 cluster sizes, and assume independence working correlation structures. Survey methods will  
129 be used to replace GEE algorithms if the GEE algorithms fail. Such failure can occur when  
130 clusters (practice sites) are large. SAS, Stata, and R all have survey algorithms for logit link  
131 model.

132

133 Confidence bounds, alternatively, will be generated using percentile-based, bootstrap  
134 resampling of the practices to account for correlation of visit-level measures within practices to  
135 verify the validity of robust standard errors output by standard GEE procedures (Davison 1997)  
136 at our sample size of practices. Confidence bounds based on resampling will protect against  
137 large-sample assumptions made by standard implementations of GEE(Goodman 1994).

138

139 Programs for resampling are well described in R (Cluster.Bootstrap (2018), Stata, and in SAS  
140 (PROC SURVEY SELECT). We will use whichever one is easiest.

141

#### 142 *Secondary Analysis*

143 Person-level analyses (vaccination rates) will employ the same marginal model methods as  
144 visit-level analyses.

145

146

147

148

149

150

#### 151 **References**

152

153 Davison AC, Hinkley DV. Bootstrap methods and their application. Cambridge ; New York, NY,  
154 USA: Cambridge University Press; 1997.

155

156 Fitzmaurice GM, Laird NM, Ware JH. Applied longitudinal analysis. 2nd ed. Hoboken, N.J.:  
157 Wiley; 2011.

158

159 Goodman, Steven N., and Jesse A. Berlin. "The use of predicted confidence intervals when  
160 planning experiments and the misuse of power when interpreting results." *Annals of internal*  
161 *medicine* 121.3 (1994): 200-206.

162

163 Hayes RJ, Moulton LH. Cluster randomised trials, second edition. CRC Press, 2017

164

165 Huang S, Fiero MH, Bell ML. Generalized estimating equations in cluster randomized trials with  
166 a small number of clusters: Review of practice and simulation study. *Clin Trials*. 2016;  
167 13(4):445-9. [PMID: 27094487]

168

169 Korn EL, Graubard BI. Analysis of health surveys. New York: Wiley; 1999.

170

171

172 .

173
