# Supplementary material
Source: PubMed Central journal article supplement (PMC8145158)
Supplement: jamapediatr-e210766-s003.pdf [file jamapediatr-e210766-s003.pdf]

## Data Sharing Statement

Szilagyi. Effect of Training Pediatric Clinicians in Human Papillomavirus Communication Strategies on Human Papillomavirus Vaccination Rates. *JAMA Pediatr*. Published May 24, 2021.

doi:10.1001/jamapediatrics.2021.0766

### Data

**Data available:** No

### Additional Information

**Explanation for why data not available:** Because of confidentiality issues and desires by practices, individual patient data will not be made available universally. However the authors would be happy to respond to requests for data including a data dictionary and will review requests on an individual basis.
